# Supplementary material for: Wilms tumor reveals DNA repair gene hyperexpression is linked to lack of tumor immune infiltration
Source: HighWire-hosted journal article supplement (doi:10.1136/jitc-2022-004797), 2022-06-01
Supplement: jitc-2022-004797supp002_data_supplement.xlsx [file jitc-2022-004797supp002_data_supplement.xlsx]

## Sheet: SI Table 1
SI Table 1. 496 candidate genes identified in Wilms tumor
C1orf112
MTMR7
KDM1A
ARHGAP33
MEOX1
LIG3
NCAPD2
DPF1
BRCA1
HSF2
BCLAF1
HMGB3
NUP160
DEPDC1B
SPDL1
POLQ
MPHOSPH9
ZNF280C
PHF21B
QSER1
SNCAIP
IPO5
MCM10
TMEM206
MTHFD2
SMARCD1
ASPM
TRMT11
RRP15
SYT1
PRR11
KIF2A
NUCKS1
LRP6
RAD18
TRIP13
TCF3
MCM2
IGF2BP2
TEAD2
ZNF532
GTSE1
ADD2
CACNG4
MCM6
SPAG5
MBNL3
N4BP2
HOXA9
SENP1
KIF22
RFX3
RBL1
PIBF1
PDS5B
NKAIN1
IGSF9
ORC1
RAD54L
TPX2
CMTM1
PCBP4
TFAP4
KIF4A
CLSPN
GPATCH2
CDC6
CBX5
MSH2
SRPK1
2021-09-03
RBFOX2
KCTD17
ZBED4
SIX4
FAM83D
POLA1
SCML2
PCYT1B
CENPI
SALL1
MAZ
EYA1
MCM4
FSD1
PTPRS
KCNN1
SP4
HOXA5
HOXA6
CASP2
EZH2
CEP41
UBE2R2
ABHD17B
CCNJ
SMC3
UBE2S
MPP2
TMEM97
NEIL3
WHSC1
NCAPG
MDK
FOXM1
RFC5
CAND1
NUP107
TIMELESS
PHC1
RNGTT
FBXO5
MCM3
BACH2
E2F3
WASF1
SOBP
TTK
CEP72
KIF20A
PCDHB6
LMNB1
NUP155
SMC4
ECT2
PODXL2
ACVR2B
CCDC88A
MSH6
ALMS1
KIF21B
KDM5B
RGS4
PRRC2C
NEK2
ARID1A
CENPF
KIF14
CASP8AP2
MYB
TGIF2
KLF12
SET
CNTRL
DNMT3A
ATAD2B
HELLS
PCDHB10
CENPL
CCDC77
ENOX1
TMPO
NCAPH
KIF18A
ZMYM2
ZRANB3
CCDC18
KIAA1549
TRIM24
CDK2
IKZF4
STIL
HJURP
ZNF391
NUP153
DEK
TMTC4
C17orf53
GTF3C4
MCM8
TMEM35
PKMYT1
PPAT
CCDC136
KCNC1
FAM64A
SGOL1
LPPR3
DNMT1
PRR7
TOP2A
SSTR4
NASP
CDK8
WASF3
ANKRD32
TEX15
ZCCHC11
RNFT2
GDF11
TROAP
ESPL1
HNRNPA1
SLC26A10
ZNF670
BORA
BRIP1
ACTL6A
SMC2
CDK5RAP2
TUBB2B
ATAT1
SLCO5A1
LRRC49
CENPO
KIF11
KIF20B
TET1
DNA2
FAM117B
ABI2
ZGRF1
CENPE
FAM60A
COL2A1
BRCA2
DIAPH3
REM2
FANCI
TICRR
RPRD1A
ASXL3
RNF165
PLK4
GPR161
UCK2
POU2F1
HMCN1
PIP5K1A
ANP32E
DTL
INTS7
VASH2
TAF1A
TP53BP2
UBAP2L
EFNA3
GATAD2B
CEP170
NVL
PARP1
OSR1
TRIM43
CDCA7
FANCD2
PTPRG
ZNF660
TAGLN3
SKP2
PRIM2
IRAK1BP1
MMS22L
ZMYM4
CDCA5
TMEM209
NCAPG2
GINS4
UHRF2
HAUS6
ZNF462
USP6NL
MKI67
TAF5
FAM57B
HMGA2
SACS
CENPJ
SPC25
TADA1
SUV39H2
CENPH
ENAH
CCSAP
SRSF12
EME1
AFF2
KIF5A
SCAF4
PHF6
KAT6B
ATAD2
BUB1B
DPYSL5
CDC25C
ZSCAN12
CACHD1
SV2A
ANKLE1
MPP3
SHANK1
FAM171A2
RACGAP1
C16orf59
CCNF
NTN3
FUBP1
KCNT2
ZNF281
ZNF496
VANGL2
FLVCR1
KIF26B
FAM84A
CCDC138
SMARCAD1
TRIM46
KIAA1524
SGOL2
SPICE1
TOPBP1
KIF15
RFC4
PBRM1
CDC25A
C7orf60
USP49
PSIP1
FAT3
SLC7A3
SKA3
DDIAS
E2F7
ARL5B
FRS2
DCHS1
MCM7
CENPV
ZNF606
ZCCHC18
PLK1
ZBTB39
TMEM194A
C16orf92
RRM1
CHAF1A
RCOR2
CASKIN1
KIAA1586
GNG4
NT5DC2
ANTXR1
CKAP2L
ROBO1
KCNAB3
CHD7
ZBTB26
BPTF
ATF7IP
PURG
ADAMTS20
TNKS
THAP2
SMARCC1
CBX2
EXO1
GCSAM
CNIH2
CKAP5
ZNF519
ALG10B
JAKMIP2
ATAD5
RTTN
ACBD7
SLC35G1
ZSCAN2
LMNB2
CDK5R1
SOX11
POLE
ZBTB34
GSG2
PCDHB9
ZNF354C
TMEM151B
GEN1
RMI1
RCC2
LBX2
C3orf80
ZDHHC20
ZNF322
ZNF678
FANCB
MEX3D
RTKN2
UNC5C
B4GALNT4
CEP97
EPHB3
RGS7
GJC1
CALN1
SH2D7
TRAIP
LIN9
ZNF730
SCN5A
KCNH8
HIST1H1B
KNTC1
ZNF93
HIST1H2BL
PBX1
SHC4
DNAH14
POMK
NKAIN3
KIF18B
KIF24
ERCC6L
C3orf70
NAP1L1
TSPYL4
ZNF385C
TET3
FANCA
LIN28B
ZFP69B
ZNF793
CENPP
SBK1
FAM72B
LIPI
FAM111B
ARID2
SP6
PCDH18
ZNF724P
GREB1
FAM217B
NUDT11
ZNF124
FAM72A
XRCC2
HDAC2
HIST3H2BB
PGAP1
NOL4L
SYNGAP1
BLM
TRIM33
ZNF695
ZNF677
ZNF273
ZNF667
PRIM1
ZNF649
ZKSCAN8
IPO9
ANKRD13B
CHAMP1
DCAF12
ITPRIPL1
CHML
BTNL2
RANBP17
FAM216A
C4orf46
KLHL23
TRIM59
ARHGAP19
GPC2
ZNF726
SOGA3
TCP11X2
FAM72D
FANCG
NTF4
KIFC1
TMEFF1
PEG10
CCDC169
EFNA4
ETV5
THEGL
CCDC169-SOHLH2
HOXA10
PRKDC
MEX3A
FAM72C
RBM8A
BAHCC1
CCDC177
NXF2B
SLC25A53
RPS10-NUDT3
ZBTB8B
HIST1H2BM
HIST1H2BO
XKR5
UHRF1
HIST1H2BF
ZNF8
HIST1H2AM
CH17-140K24.5

## Sheet: SI Table 2
SI Table 2. Top overexpressed DNA repair genes in Wilms tumor listed by relevant pathway
DNA Repair Pathway	Upregulated Genes in Wilms
Mismatch Repair	MSH2, MSH6, POLE, EXO1
DNA Damage Checkpoint	BLM, BRCA1, FANCA, MDC1, RAD18, RFC4, RFC5, TOPBP1
Base/Nucleotide Excision Repair	LIG3, PARP1, POLE
Homologous Recombination Repair	BLM, BRCA1, BRCA2, FANCA, FANCG, FANCI, FANCD2
Nonhomologous End-Joining	PRKDC

## Sheet: SI Table 3
SI Table 3. 480 genes in MSigDB Go DNA Repair gene signature
ABL1
ACTL6A
ACTR5
ACTR8
ALKBH1
ALKBH2
ALKBH3
ANKRD32
APBB1
APEX1
APEX2
APITD1
APLF
APTX
AQR
ASCC1
ASCC2
ASCC3
ASF1A
ASTE1
ATM
ATR
ATRIP
ATRX
ATXN3
BABAM1
BACH1
BARD1
BAZ1B
BCCIP
BLM
BOD1L
BRCA1
BRCA2
BRCC3
BRE
BRIP1
BTG2
C11orf30
C12orf32
C12orf48
C15orf42
C16orf53
C16orf73
C17orf70
C19orf39
C19orf40
C1orf124
C1orf86
C20orf29
C20orf72
C9orf102
C9orf142
C9orf80
CCDC111
CCDC155
CCNH
CCNO
CDC14B
CDC45
CDC5L
CDC7
CDCA5
CDK1
CDK2
CDK7
CDK9
CDKN2D
CEP164
CETN2
CHAF1A
CHAF1B
CHD1L
CHEK1
CHEK2
CHRNA4
CIB1
CINP
CLSPN
COPS2
COPS3
COPS4
COPS5
COPS6
COPS7A
COPS7B
COPS8
CRY2
CSNK1D
CSNK1E
CUL4A
CUL4B
DCLRE1A
DCLRE1B
DCLRE1C
DDB1
DDB2
DDX1
DEM1
DMAP1
DMC1
DNA2
DTL
DTX3L
EEPD1
EID3
EME1
EME2
ENDOV
EP300
EPC2
ERCC1
ERCC2
ERCC3
ERCC4
ERCC5
ERCC6
ERCC8
ESCO2
EXD2
EXO1
EYA1
EYA2
EYA3
EYA4
FAM175A
FAM178A
FAN1
FANCA
FANCB
FANCC
FANCD2
FANCE
FANCF
FANCG
FANCI
FANCL
FANCM
FBXO18
FBXO6
FEN1
FOXM1
FTO
FZR1
GADD45A
GEN1
GGN
GINS2
GINS4
GPS1
GTF2H1
GTF2H2
GTF2H2C
GTF2H2D
GTF2H3
GTF2H4
GTF2H5
H2AFX
HELQ
HERC2
HINFP
HIST1H4A
HIST1H4B
HIST1H4C
HIST1H4D
HIST1H4E
HIST1H4F
HIST1H4H
HIST1H4I
HIST1H4J
HIST1H4K
HIST1H4L
HIST2H4A
HIST2H4B
HIST3H2A
HIST3H3
HIST4H4
HLTF
HMGA1
HMGA2
HMGB1
HMGB2
HMGN1
HSPA1A
HUS1
HUS1B
HUWE1
IGHMBP2
INO80
INO80B
INO80C
INO80D
INO80E
INTS3
ISG15
ISY1
JMY
KAT5
KDM2A
KDM4D
KIAA0101
KIAA0146
KIAA0415
KIAA0430
KIAA1530
KIF22
KIN
LIG1
LIG3
LIG4
LOC100133315
MAD2L2
MBD4
MC1R
MCM8
MCM9
MCRS1
MDC1
MEN1
MGMT
MLH1
MLH3
MMS19
MMS22L
MNAT1
MORF4L1
MORF4L2
MPG
MRE11A
MSH2
MSH3
MSH4
MSH5
MSH6
MTA1
MTOR
MUM1
MUS81
MUTYH
NBN
NCOA6
NDNL2
NEIL1
NEIL2
NEIL3
NFRKB
NHEJ1
NONO
NPLOC4
NPM1
NSMCE1
NSMCE2
NSMCE4A
NTHL1
NUDT1
OBFC2A
OBFC2B
OGG1
OTUB1
PALB2
PAPD7
PARP1
PARP2
PARP3
PARP4
PARP9
PAXIP1
PCNA
PIAS4
PIF1
PMS1
PMS2
PMS2CL
PMS2P1
PMS2P3
PMS2P5
PNKP
POLA1
POLB
POLD1
POLD2
POLD3
POLD4
POLE
POLE2
POLG
POLG2
POLH
POLI
POLK
POLL
POLM
POLN
POLQ
POLR2A
POLR2B
POLR2C
POLR2D
POLR2E
POLR2F
POLR2G
POLR2H
POLR2I
POLR2J
POLR2K
POLR2L
PPIE
PPP5C
PRKDC
PRMT6
PRPF19
PSMD14
PSME4
PTTG1
RAD1
RAD17
RAD18
RAD21
RAD21L1
RAD23A
RAD23B
RAD50
RAD51
RAD51AP1
RAD51B
RAD51C
RAD51D
RAD52
RAD54B
RAD54L
RAD9A
RAD9B
RBBP8
RBM14
RBX1
RCHY1
REC8
RECQL
RECQL4
RECQL5
REV1
REV3L
RFC1
RFC2
RFC3
RFC4
RFC5
RFWD3
RIF1
RMI1
RMI2
RNASEH2A
RNF111
RNF138
RNF168
RNF8
RPA1
RPA2
RPA3
RPA4
RPAIN
RPS27A
RPS27L
RPS3
RRM2B
RTEL1
RUVBL1
RUVBL2
SETD2
SETMAR
SETX
SFPQ
SFR1
SHFM1
SHPRH
SIRT1
SIRT6
SLC30A9
SLX1A
SLX1B
SLX4
SMARCA5
SMARCAD1
SMARCB1
SMC1A
SMC3
SMC5
SMC6
SMG1
SMUG1
SPATA22
SSRP1
STRA13
STUB1
SUMO1
SUMO2
SUMO3
SUPT16H
SWI5
SYCP1
TAOK1
TAOK3
TCEA1
TDG
TDP1
TDP2
TEX12
TEX15
TFPT
TNP1
TONSL
TOP3A
TOPBP1
TP53
TP53BP1
TP73
TREX1
TREX2
TRIM25
TRIM28
TRIP12
TRIP13
TRRAP
TTC5
UBA52
UBA7
UBB
UBC
UBE2A
UBE2B
UBE2D3
UBE2F
UBE2I
UBE2L6
UBE2N
UBE2NL
UBE2T
UBE2U
UBE2V1
UBE2V2
UBE2W
UBR5
UCHL5
UFD1L
UHRF1
UIMC1
UNG
UPF1
USP1
USP10
USP28
USP3
USP43
USP45
USP47
USP7
UVRAG
VCP
WDR33
WDR48
WHSC1
WRN
WRNIP1
XAB2
XPA
XPC
XRCC1
XRCC2
XRCC3
XRCC4
XRCC5
XRCC6
XRCC6BP1
YY1
ZBTB1
ZBTB32
ZFYVE26
ZNF830
ZRANB3
ZSWIM7

## Sheet: SI Table 4
SI Table 4. 50 genes in DNA repair score
ACTL6A
ANKRD32
BLM
BRCA1
BRCA2
BRIP1
CDCA5
CDK2
CHAF1A
CLSPN
DNA2
DTL
EME1
EXO1
EYA1
FANCA
FANCB
FANCD2
FANCG
FANCI
FOXM1
GEN1
GINS4
HMGA2
KIF22
LIG3
MCM8
MMS22L
MSH2
MSH6
NEIL3
PARP1
POLA1
POLE
POLQ
PRKDC
RAD18
RAD54L
RFC4
RFC5
RMI1
SMARCAD1
SMC3
TEX15
TOPBP1
TRIP13
UHRF1
WHSC1
XRCC2
ZRANB3
